# Supplementary material
Source: HighWire-hosted journal article supplement (https://www.annfammed.org/highwire/filestream/8322/field_highwire_adjunct_files/1/Gillam_Supp_Table_2.pdf)
Supplement: Gillam_Supp_Table_2.pdf [file Gillam_Supp_Table_2.pdf]

**Online Supplementary Material**

Gillam SJ, Siriwardena AN, Steel N. Pay-for-performance in the United Kingdom: impact of the Quality and Outcomes Framework—a systematic review. *Ann Fam Med.* 2012;10(5):461-468.

<http://www.annfammed.org/content/full/10/5/461>

**Supplemental Table 2. Impact of Quality of Outcomes Framework (QOF) on Efficiency and Costs: Description of Studies Reviewed**

| Study                          | Condition               | Study Period, Design                              | Data Source                                                                          | Sample Size, Setting                                                                                      | Results                                                                                                                                                                                                                                                                                                                                                                                                                     |
|--------------------------------|-------------------------|---------------------------------------------------|--------------------------------------------------------------------------------------|-----------------------------------------------------------------------------------------------------------|-----------------------------------------------------------------------------------------------------------------------------------------------------------------------------------------------------------------------------------------------------------------------------------------------------------------------------------------------------------------------------------------------------------------------------|
| Alabbadi (2010) <sup>1</sup>   | Statin prescribing      | 2005<br><br>Cross-sectional study                 | QOF data, practice prescribing data                                                  | Primary care practices<br><br>Northern Ireland and England                                                | Significantly fewer statins (defined daily doses/1,000 patients) were dispensed in Northern Ireland compared with the matched region in England both before and after the introduction of QOF ( $P < .001$ ). However, significantly more statins were dispensed in both regions after the introduction of QOF                                                                                                              |
| Fleetcroft (2006) <sup>2</sup> | Multiple – 7 conditions | 2004-2005<br><br>Cost-consequence                 | Literature review                                                                    |                                                                                                           | Maximum payments for the 8 preventive interventions examined make up 57% of the total maximum payment for all clinical interventions in the (QOF). There appears to be no relationship between pay and health gain across these 8 interventions                                                                                                                                                                             |
| Fleetcroft (2006) <sup>3</sup> | Multiple – 7 conditions | 2002-2003                                         | QOF data and routine data on pharmaceutical expenditure                              | 71 Practices<br><br>Norfolk and Waveney, England                                                          | Significant correlations between prescribing quality and expenditure were found in only 1 of the 7 areas. When quality scores were combined into a composite quality index weighted by health gain, a small positive association was found, but this association is lost if all indicators are weighted equally                                                                                                             |
| Shohet (2007) <sup>4</sup>     | Epilepsy                | 2004-2005<br><br>Ecological cross-sectional study | QOF data from the NHS Information Centre and Hospital Episodes Statistics (HES) data | General practices and hospitals in the 3 counties of Norfolk, Suffolk, and Cambridge-shire<br><br>England | For every 1% increase in the proportion of seizure-free epilepsy-treated patients there was a 0.43% reduction in the number of patients with at least 1 epilepsy-related emergency hospitalization (95% CI, $-0.09$ to $-0.78$ , $P = .014$ ). In other words, the quality of care as incentivized by the QOF system appears to lead to improved outcomes in terms of minimizing epilepsy-related emergency hospitalization |
| Walker (2010) <sup>5</sup>     | Multiple – 6 conditions | 2004-2005<br><br>Cost effectiveness               | Literature review                                                                    | Economic analysis<br><br>UK                                                                               | Average indicator payments ranged from £0.63 to £40.61 per patient, and the percentage of eligible patients treated ranged from 63% to 90%. For most indicators that can be assessed, QOF incentive payments are likely to be a cost-effective use of resources. However, only a small subset of the indicators was considered, and no account was taken of the costs of administering the QOF scheme                       |

**References**

1. Alabbadi I, Crealey G, Turner K, et al. Statin prescribing in Northern Ireland and England pre and post introduction of the quality and outcomes framework. *Pharm World Sci.* 2010;32(1):43-51.
2. Fleetcroft R, Cookson R. Do the incentive payments in the new NHS contract for primary care reflect likely population health gains? *J Health Serv Res Policy.* 2006;11(1):27-31.
3. Fleetcroft R, Cookson R. The relationship between prescribing expenditure and quality in primary care: an observational study. *Br J Gen Pract.* 2006;56(529):613-619.
4. Shohet C, Yelloly J, Bingham P, Lyratzopoulos G. The association between the quality of epilepsy management in primary care, general practice population deprivation status and epilepsy-related emergency hospitalisations. *Seizure.* 2007;16(4):351-355.
5. Walker S, Mason AR, Claxton K, et al. Value for money and the Quality and Outcomes Framework in primary care in the UK NHS. *Br J Gen Pract.* 2010;60(574):e213-e222.
